# Supplementary material for: Causal Relations between Exposome and Stroke: A Mendelian Randomization Study
Source: PubMed Central journal article supplement — J Stroke. 2022 May 31;24(2):236–44. doi: 10.5853/jos.2021.01340 (PMC9194538; doi:10.5853/jos.2021.01340), 2022-05-31
Supplement: jos-2021-01340-suppl25.pdf [file jos-2021-01340-suppl25.pdf]

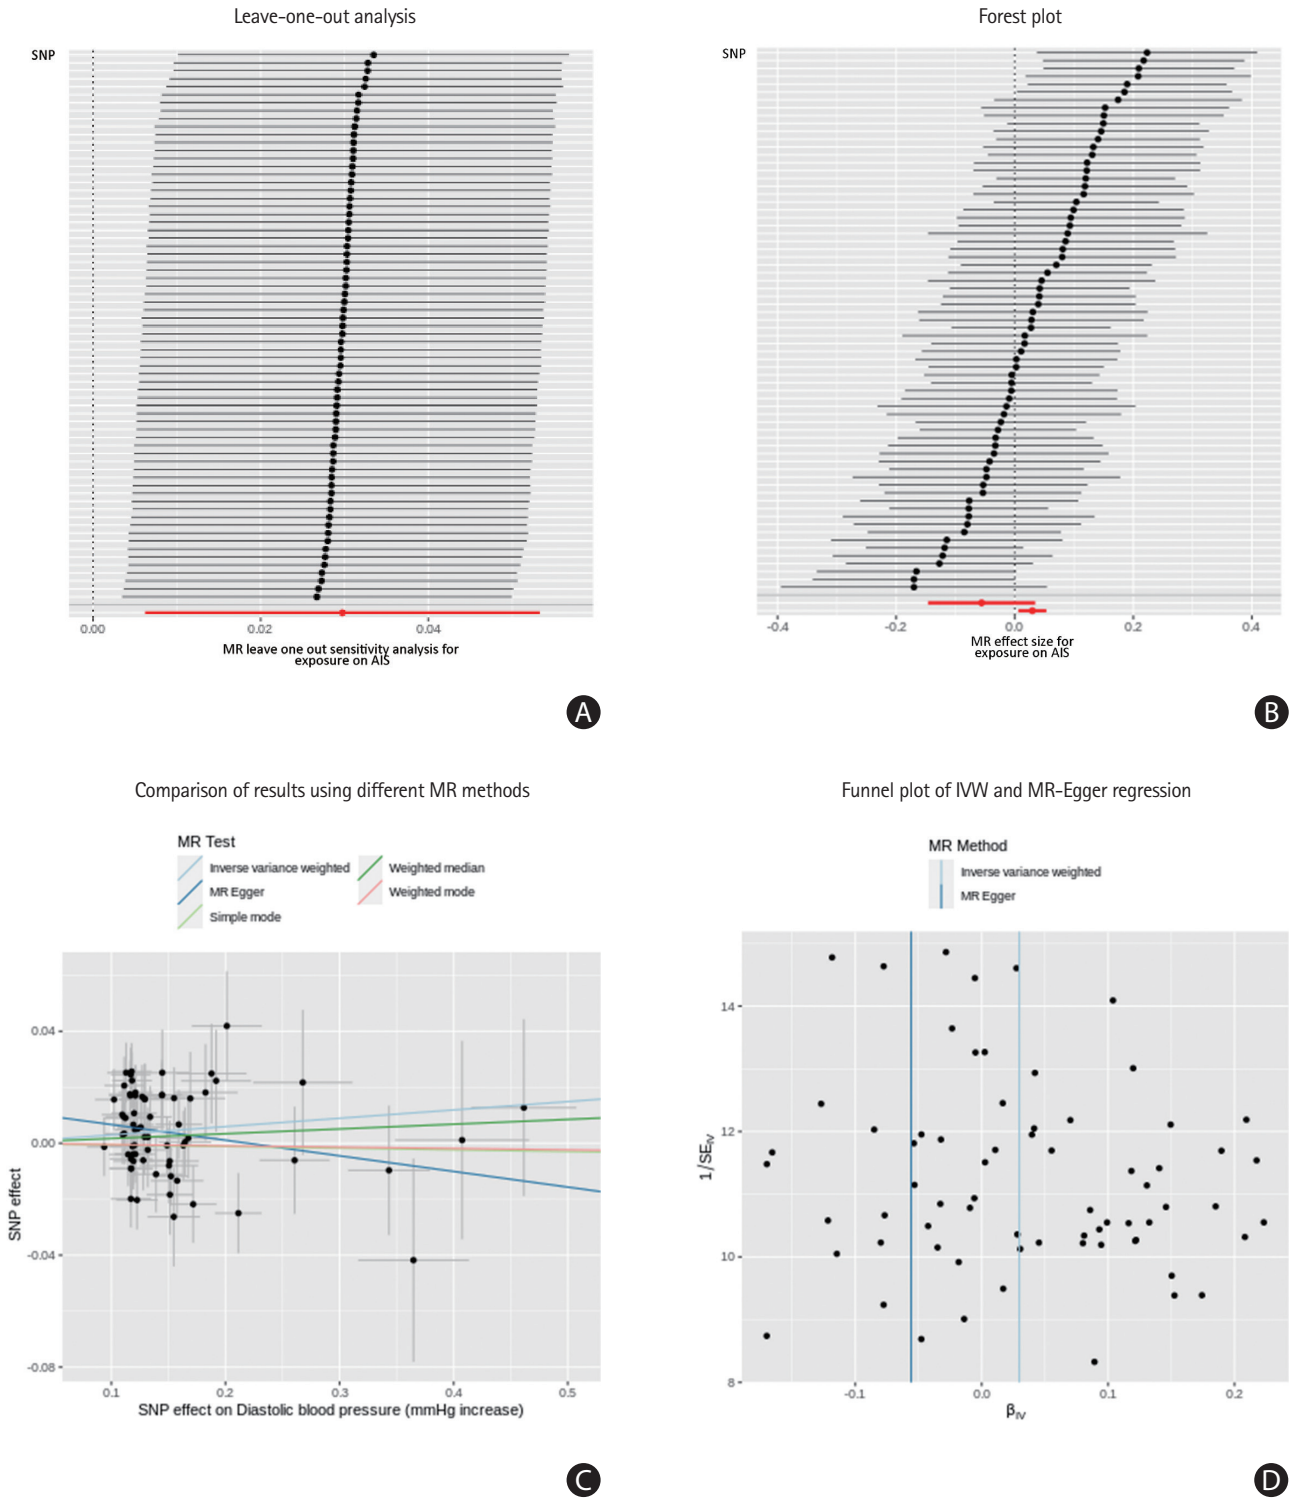

**Supplementary Figure 25.** The leave-one-out analysis, single nucleotide polymorphism (SNP) analysis, sensitivity analysis, and funnel plot for diastolic blood pressure and any ischemic stroke (AIS). (A) Leave-one-out analysis, (B) forest plot, (C) comparison of results using different Mendelian randomization (MR) methods, (D) funnel plot of inverse-variance weighted (IVW) and MR-Egger regression. SE, standard error.
